# Supplementary material
Source: publisher site journal article supplement (https://www.dovepress.com/article/500215)
Supplement: Supplementary file 1 [file get_supplementary_file.php]

Supplementary Material

**Figure S1** Quality control and preliminary analysis of GC scRNA-seq data. **(A, B)** After quality control of the scRNA-seq data, the feature expression levels in 14,976 cells were selected for subsequent analysis. **(C)** The variance plot shows gene expression in each STAD sample, with the five genes having the highest normalized variance flagged. **(D)** Score values of 20 genes in STAD across different dimensions. **(E, F)** Dimensionality reduction by PCA revealed significant differences among the STAD samples, and Harmony was utilized for batch correction. **(G)** The elbow plot indicates that the optimal number of principal components is 10.

**Figure S2** Identification of tumor cell subtypes based on the neutrophil subtypes. **(A)** PCA based on neutrophil subtype. **(B)** Harmony removed the batch effect. **(C)** ElbowPlot observation of the optimal number of PCs. **(D)** Analysis with FindClusters resulted in the successful classification of 8 cell clusters. **(E)** Proportions of the 8 cell clusters in tumor and control samples. **(F-I)** Pseudotime analysis of single cells. **(F)** Trajectory analysis based on cell cluster. **(G)** Heatmap showing the changes in the expression of the potential feature genes along the pseudotime developmental trajectories. **(H)** Trajectory analysis based on cell type. **(I)** Scatterplot showing the differentially expressed genes related to the developmental trajectories.

**Figure S3** Functional pathway and protein interaction network analyses of the candidate gene set. **(A)** Pathway analysis of 500 module genes based on the Metascape database. **(B)** Cytoscape visualization of protein interaction networks in the gene set.

**Figure S4.** Comparative analyses of tumor immune dysfunction and rejection between the subtypes. **(A)** Differences in the Exclusion status between the subtypes. **(B)** Differences in the No Benefit status between the subtypes. **(C)** Differences in the Responder status between the subtypes. **(D)** Differences in the Dysfunction status between the subtypes.

**Figure S5** Regulatory network analysis of key genes. **(A)** Enrichment analysis of the transcription factors VIM, RBMS1 and RGS2. **(B)** Enriched motifs and corresponding transcription factors for key genes.

**Table S1.** The sequences of primers used for qRT-PCR

| **Gene** | **Primer Sequence (5’-3’)** |
| --- | --- |
| VIM (forward) | AGTCCACTGAGTACCGGAGAC |
| VIM (reverse) | CATTTCACGCATCTGGCGTTC |
| RBMS1 (forward) | GTGCAAAGTCCTTCGTGGAT |
| RBMS1 (reverse) | TCCTTGCATAGCTGACGTTG |
| RGS2 (forward) | AAGATTGGAAGACCCGTTTGAG |
| RGS2 (reverse) | GCAAGACCATATTTGCTGGCT |
| GAPDH (forward) | ACCCACTCCTCCACCTTTGAC |
| GAPDH (reverse) | TGTTGCTGTAGCCAAATTCGTT |
| si-RBMS1 (forward) | GAUGCAACCUCAACCAUAUTT |
| si-RBMS1 (reverse) | AUAUGGUUGAGGUUGCAUCTT |
| si-RGS2 (forward) | CAGCAAAUAUGGUCUUGCUTT |
| si-RGS2 (reverse) | AGCAAGACCAUAUUUGCUGTT |
| si-NC (forward) | UUCUCCGAACGUGUCACGUTT |
| si-NC (reverse) | ACGUGACACGUUCGGAGAATT |

**Table S2.** Univariate cox regression regarding os of candidate genes in all data

| ID | HR | z | *P* value | lower | upper |
| --- | --- | --- | --- | --- | --- |
| RGS2 | 1.33021010504482 | 3.56145377788657 | 0.000368807041934044 | 1.13690347478136 | 1.55638448013684 |
| SLC2A3 | 1.3064527222908 | 3.42229850557811 | 0.000620941019986009 | 1.12100196752297 | 1.52258315777315 |
| VIM | 1.33044008208566 | 3.27901564433752 | 0.00104169860886583 | 1.1217076313599 | 1.57801441528409 |
| RBMS1 | 1.32527247215931 | 3.10420883514088 | 0.00190788611858546 | 1.10938683326601 | 1.58316925422001 |
| PPP1R3B | 1.27705766397727 | 2.99038277026228 | 0.00278628056114218 | 1.08792199496172 | 1.49907464384013 |
| PJA2 | 1.26180763039875 | 2.86721992648849 | 0.00414095141591825 | 1.07635767532593 | 1.47920949757745 |
| TIMP2 | 1.28791765750246 | 2.86669112046651 | 0.0041478762453513 | 1.08332141100433 | 1.53115398224138 |
| PDE4B | 1.25980259761602 | 2.79140842886897 | 0.00524792046907721 | 1.07121326474765 | 1.48159347647171 |
| PECAM1 | 1.27131279493495 | 2.76605022940884 | 0.00567397944835627 | 1.07246069893661 | 1.5070353852294 |
| BASP1 | 1.24301936411658 | 2.7120900833001 | 0.00668604198727405 | 1.06218688009361 | 1.45463775586516 |
| CD93 | 1.26603987818687 | 2.71024999574568 | 0.0067232512037404 | 1.06748257212945 | 1.50152987506109 |
| RAB31 | 1.26717042206496 | 2.7004525342813 | 0.00692452170556548 | 1.06708323341621 | 1.50477566160951 |
| ZFP36 | 1.26086957431153 | 2.67117108992057 | 0.00755871092256029 | 1.06366219943014 | 1.49464001285019 |
| RGS18 | 1.24708701288776 | 2.65495734558031 | 0.00793184374078673 | 1.05950517167286 | 1.46787959067511 |
| PTPRJ | 0.786374143666642 | -2.635524307 | 0.00840074088275436 | 0.657675506175528 | 0.940257449184071 |
| GLIPR1 | 1.21757069049828 | 2.61250015502325 | 0.00898826515493929 | 1.05039894177318 | 1.41134794353265 |
| TUBA1A | 1.22957465475688 | 2.60850771262172 | 0.00909379624143793 | 1.05272620315041 | 1.43613204183206 |
| STEAP4 | 1.2210963321795 | 2.606107175 | 0.00915778017823164 | 1.05077148025929 | 1.41902999888642 |
| MAPK14 | 1.2369515629297 | 2.58245234384199 | 0.00981009098568647 | 1.05259474039373 | 1.45359758159336 |
| UBE2B | 1.24972334317542 | 2.57868720638063 | 0.00991765449505821 | 1.0549436456217 | 1.48046622296791 |

**Table S3.** Relationship of VIM Expression Levels (Δ*C*t) in Cancer Tissues with Clinicopathological Factors of GC Patients

| Characteristics | No.of case (%) | Mean±SD | *P* value |
| --- | --- | --- | --- |
|
| Age (y) |  |  |  |
| ≥60 | 23 (76.7) | 2.533±1.352 | 0.781 |
| <60 | 7 (23.3) | 2.371±1.300 |  |
| Gender |  |  |  |
| Male | 24 (80.0) | 2.600±1.240 | 0.393 |
| Female | 6 (20.0) | 2.075±1.664 |  |
| Diameter (cm) |  |  |  |
| ≥5 | 17 (56.7) | 2.966±1.435 | 0.016 |
| <5 | 13 (43.3) | 1.880±0.860 |  |
| Differentiation |  |  |  |
| Well | 7 (23.3) | 2.819±1.749 | 0.468 |
| Poor | 23 (76.7) | 2.397±1.191 |  |
| Pathologic diagnosis |  |  |  |
| Signet ring cell cancer | 6 (20.0) | 2.283±1.398 | 0.667 |
| Adenocarcinoma | 24 (80.0) | 2.549±1.325 |  |
| Invasion |  |  |  |
| T1＆T2 | 5 (16.7) | 1.565±0.591 | 0.084 |
| T3＆T4 | 25 (83.3) | 2.681±1.353 |  |
| Lymphatic metastasis |  |  |  |
| N 0 | 8 (26.7) | 2.168±1.286 | 0.423 |
| N 1-3 | 22 (73.3) | 2.614±1.341 |  |
| Distal metastasis |  |  |  |
| M0 | 27 (90.0) | 2.425±1.344 | 0.393 |
| M1 | 3 (10.0) | 3.126±1.061 |  |
| Venous invasion |  |  |  |
| Absent | 5 (16.7) | 1.869±0.449 | 0.252 |
| Present | 25 (83.3) | 2.621±1.405 |  |
| Perineural invasion |  |  |  |
| Absent | 12 (40.0) | 2.182±1.148 | 0.296 |
| Present | 18 (60.0) | 2.704±1.415 |  |

**Table S4.** Relationship of RBMS1 Expression Levels (Δ*C*t) in Cancer Tissues with Clinicopathological Factors of GC Patients

| Characteristics | No.of case (%) | Mean±SD | *P* value |
| --- | --- | --- | --- |
|
| Age (y) |  |  |  |
| ≥60 | 23 (76.7) | 7.396±1.973 | 0.122 |
| <60 | 7 (23.3) | 6.041±1.955 |  |
| Gender |  |  |  |
| Male | 24 (80.0) | 7.291±2.101 | 0.260 |
| Female | 6 (20.0) | 6.236±1.519 |  |
| Diameter (cm) |  |  |  |
| ≥5 | 17 (56.7) | 7.742±2.017 | 0.038 |
| <5 | 13 (43.3) | 6.214±1.734 |  |
| Differentiation |  |  |  |
| Well | 7 (23.3) | 6.872±1.797 | 0.761 |
| Poor | 23 (76.7) | 7.143±2.117 |  |
| Pathologic diagnosis |  |  |  |
| Signet ring cell cancer | 6 (20.0) | 6.288±2.479 | 0.291 |
| Adenocarcinoma | 24 (80.0) | 7.278±1.899 |  |
| Invasion |  |  |  |
| T1＆T2 | 5 (16.7) | 6.272±1.424 | 0.336 |
| T3＆T4 | 25 (83.3) | 7.241±2.105 |  |
| Lymphatic metastasis |  |  |  |
| N 0 | 8 (26.7) | 6.696±2.935 | 0.540 |
| N 1-3 | 22 (73.3) | 7.220±1.640 |  |
| Distal metastasis |  |  |  |
| M0 | 27 (90.0) | 6.990±2.105 | 0.475 |
| M1 | 3 (10.0) | 7.889±0.723 |  |
| Venous invasion |  |  |  |
| Absent | 5 (16.7) | 5.387±1.682 | 0.038 |
| Present | 25 (83.3) | 7.418±1.935 |  |
| Perineural invasion |  |  |  |
| Absent | 12 (40.0) | 7.071±2.423 | 0.985 |
| Present | 18 (60.0) | 7.086±1.779 |  |

**Table S5.** Relationship of RGS2 Expression Levels (Δ*C*t) in Cancer Tissues with Clinicopathological Factors of GC Patients

| Characteristics | No.of case (%) | Mean±SD | *P* value |
| --- | --- | --- | --- |
|
| Age (y) |  |  |  |
| ≥60 | 23 (76.7) | 6.776±2.080 | 0.965 |
| <60 | 7 (23.3) | 6.813±1.484 |  |
| Gender |  |  |  |
| Male | 24 (80.0) | 6.593±1.769 | 0.287 |
| Female | 6 (20.0) | 7.549±2.529 |  |
| Diameter (cm) |  |  |  |
| ≥5 | 17 (56.7) | 7.659±1.816 | 0.003 |
| <5 | 13 (43.3) | 5.641±1.462 |  |
| Differentiation |  |  |  |
| Well | 7 (23.3) | 6.915±1.919 | 0.842 |
| Poor | 23 (76.7) | 6.744±1.979 |  |
| Pathologic diagnosis |  |  |  |
| Signet ring cell cancer | 6 (20.0) | 6.286±2.249 | 0.490 |
| Adenocarcinoma | 24 (80.0) | 6.909±1.879 |  |
| Invasion |  |  |  |
| T1＆T2 | 5 (16.7) | 6.700±2.198 | 0.917 |
| T3＆T4 | 25 (83.3) | 6.801±1.926 |  |
| Lymphatic metastasis |  |  |  |
| N 0 | 8 (26.7) | 6.872±1.912 | 0.884 |
| N 1-3 | 22 (73.3) | 6.752±1.985 |  |
| Distal metastasis |  |  |  |
| M0 | 27 (90.0) | 6.695±1.978 | 0.456 |
| M1 | 3 (10.0) | 7.590±1.506 |  |
| Venous invasion |  |  |  |
| Absent | 5 (16.7) | 5.683±0.974 | 0.167 |
| Present | 25 (83.3) | 7.004±2.014 |  |
| Perineural invasion |  |  |  |
| Absent | 12 (40.0) | 6.295±2.101 | 0.265 |
| Present | 18 (60.0) | 7.110±1.800 |  |
